# Supplementary material for: Persisted PM 2.5 pollution in the Pearl River Delta, South China, in the 2015–2017 cold seasons: The dominant role of meteorological changes during the El Niño-to-La Niña transition over emission reduction
Source: Copernicus journal article supplement (doi:10.5194/egusphere-2025-2404), 2025-06-16
Supplement: Supplementary file [file egusphere-2025-2404-AC2-supplement.pdf]

## Response to Reviewer II

### General Comments:

This manuscript presents a valuable investigation into the complex interplay between emission reductions and meteorological variability on PM<sub>2.5</sub> pollution in the Pearl River Delta from 2015 to 2017. The study is well-designed, employing the WRF/CMAQ model with a comprehensive set of sensitivity analyses to deconstruct the drivers of the observed persistent pollution. The paper is clearly written, and the conclusions are well-supported by the analysis. I enjoyed reading this manuscript. This paper is suitable for publication after some minor revisions.

### Response:

We appreciate the valuable comments and suggestions. Our responses to specific comments are provided in blue and the corresponding revisions are highlighted in red. Please note that the line numbers (indicated by “Lx”) are those in the revised manuscript with the author’s changes.

### Specific comments:

1) A minor suggestion for the title. While "Persisted" is accurate, a word like "Anomalous" or "Resurgent" might better capture the unexpected increase of PM<sub>2.5</sub> during 2015-2017. This is just a suggestion for the authors to consider.

### Response:

Thanks for this helpful suggestion. By using the word “persisted” (or “persistent”), we intended to stress that PM<sub>2.5</sub> pollution showed no significant improvement over the three-year period. However, we agree that highlighting the unexpected nature of this persistence is also important to show the significance of our findings. Therefore, we revise the title into:

Unexpectedly persistent PM<sub>2.5</sub> pollution in the Pearl River Delta, South China, in the 2015-2017 cold seasons: The dominant role of meteorological changes during the El Niño-to-La Niña transition over emission reduction

2) In Section 2.3 (line 213), the manuscript introduces the Factor Separation Method (FSM). Could the authors first confirm if this method is fully described by Equations 1-4? Second, a brief discussion on the advantages of FSM over the more traditional Brute Force Method (BFM), such as its ability to quantify the interactive effects between different emission regions, would be beneficial for readers less familiar with the technique.

### Response:

Thank you for this comment. We’ve rechecked Equations 1-4 and confirm that the FSM is fully described. In the original manuscript, we briefly introduced FSM, in L220-222:

This approach enables a detailed assessment of how much local and external emissions contribute to PM<sub>2.5</sub> pollution while also identifying their interactive effects, thus it has been applied in many previous studies (Chen et al., 2014; Uranishi et al., 2018; Qu et al., 2021b; Sun et al., 2022; Xu et al., 2023).

To improve the text, we have now added further discussion on the advantages of FSM, in L240-243:

Currently, these contributions can only be identified by the FSM approach, whereas other source apportionment methods (e.g., top-down or bottom-up Brute Force Method and the tagging method; Clappier et al., 2017) typically classify or separate them into either local or external contributions, highlighting the advantage of this method for our study.

3) Regarding the background contribution ( $F_{bg}$ ), the definition could be more explicit. Please clarify in the text that this term represents all influences from outside the d02 simulation domain, as determined by the chemical boundary conditions used in the model.

**Response:**

We appreciate the reviewer's comment. The definition of the background contribution has now been made more explicit, in L232-233:

Background contribution ( $F_{bg}$ ): Contribution from sources outside the d02, estimated as the contributions of chemical boundary conditions used in the d02 simulations.

4) Could the authors provide a more explicit discussion on the specific meteorological drivers for the changes in sulfate and nitrate? For instance, was the significant change in nitrate primarily driven by shifts in temperature and humidity (impacting chemical formation) or by changes in wind patterns (impacting transport)? Disentangling these influences would provide a clearer mechanistic understanding.

**Response:**

We thank the reviewer for this suggestion. The responses of sulfate and nitrate to meteorological changes are discussed in the Sections 4.3 and 4.4. We found that sulfate is not sensitive to meteorological changes, and explanations were added in L518-523:

Unlike  $PM_{2.5}$ , which was strongly affected by meteorological changes,  $pSO_4$  exhibited a relatively limited response to them. This may be attributed to the high proportion of  $pSO_4$  originating from cross-regional transport (80-90%) compared to local contribution (10-20%). The transport patterns remained generally consistent (Fig. 4a), resulting in insignificant changes in  $pSO_4$  contributed by transport. Although locally produced  $pSO_4$  can be influenced by local meteorological conditions, its small contribution makes the responses of the overall  $pSO_4$  level to local meteorological changes less notable.

Unlike sulfate, nitrate was notably influenced by meteorological changes, as stated in L525-528:

Also, these changes were largely driven by varying meteorological conditions, which influenced all major  $pNO_3$  source contributions, resulting in their declines during 2015-2016 and increases during 2016-2017. More analyses of the meteorological influences on  $pNO_3$  will be presented in the next section.

The reasons behind reduced nitrate are provided in L601-608:

The contributions of other processes to  $PM_{2.5}$  exhibit diversified variations, indicating complex responses of these processes to meteorological and emission changes. Overall, meteorological changes played a more important role in driving these variations. They resulted in a reduction in the contribution of aerosol process (stronger negative contributions during the daytime and weaker positive contributions at night),

which is likely associated with the enhanced partitioning of  $p\text{NO}_3$  into gas-phase  $\text{HNO}_3$ .  $\epsilon(p\text{NO}_3)$ , the proportion of  $p\text{NO}_3$  in the sum of  $p\text{NO}_3$  and gas-phase  $\text{HNO}_3$ , decreased significantly across the three cold seasons (from 70.6% in 2015 to 67.7% in 2016 and 61.7% in 2017; Table S4), suggesting a greater tendency for  $p\text{NO}_3$  to shift into the gas phase. It can be primarily attributed to meteorological changes over the three years, namely, higher temperature in 2016 and reduced RH in 2017 (Table 3).

To clearly summarize the responses of sulfate and nitrate to meteorological changes, we revised the conclusion part, in L650-654:

... Emission reduction, particularly outside the PRD, led to consistent decreases in  $p\text{SO}_4$  concentrations in the three cold seasons, whereas the influence of meteorological changes was overall limited due to the high transport (and low local) contribution to  $p\text{SO}_4$ . In contrast, the three-year changes in  $p\text{NO}_3$  concentrations were largely controlled by meteorological variations, likely associated with the varied partitioning between particle-phase  $p\text{NO}_3$  and gas-phase  $\text{HNO}_3$  under changes in local temperature and humidity.

5) In Sections 4.3 and 4.4, the text describes complex trends from the source apportionment and budget analyses. While the figures and tables are comprehensive, the narrative would be much easier to follow if key quantitative values were integrated directly into the descriptive text. This would reduce the need for the reader to constantly switch between the text, figures, and tables.

**Response:**

We thank the reviewer for the helpful suggestions. To make the Sect 4.3 and 4.4 more reader-friendly, we've added representative quantitative values in the texts, e.g. in L494-496:

As expected, reductions in local and outer emissions lowered local and direct transport contributions to  $\text{PM}_{2.5}$ , respectively, leading to overall decreases in  $\text{PM}_{2.5}$  concentrations during both 2015-2016 (by 1.2 and  $4.1 \mu\text{g m}^{-3}$ , respectively) and 2016-2017 (by 1.7 and  $1.0 \mu\text{g m}^{-3}$ , respectively).

In L516-517:

$p\text{SO}_4$ : Its concentration showed a consistent decline throughout the study period, dropping from  $9.6 \mu\text{g m}^{-3}$  in 2015 to  $7.3 \mu\text{g m}^{-3}$  in 2016 and  $6.3 \mu\text{g m}^{-3}$  in 2017.

In L524-525:

$p\text{NO}_3$ :  $p\text{NO}_3$  concentrations followed a similar change pattern as  $\text{PM}_{2.5}$ , decreasing from  $8.2 \mu\text{g m}^{-3}$  to  $5.3 \mu\text{g m}^{-3}$  during the first two cold seasons but rising to  $6.6 \mu\text{g m}^{-3}$  in 2017.

In L541-543:

$p\text{NH}_4$  concentrations declined from  $5.8 \mu\text{g m}^{-3}$  in 2015 to  $4.1 \mu\text{g m}^{-3}$  in 2016 but remained stable at  $4.0 \mu\text{g m}^{-3}$  in 2017. The influences of meteorological and emission changes on  $p\text{NH}_4$  were comparable ( $-0.7 \mu\text{g m}^{-3}$  vs.  $-0.9 \mu\text{g m}^{-3}$  during 2015-2016;  $+0.4 \mu\text{g m}^{-3}$  vs.  $-0.5 \mu\text{g m}^{-3}$  during 2016-2017).

In L583-587:

Overall, at different times of the day, both the total  $\text{PM}_{2.5}$  flux transported into and out of the PRD (hereafter referred to as  $\text{PM}_{2.5}$  influx and outflux, respectively) increased across the three cold seasons when emissions were fixed at the 2016 level. For instance, the morning  $\text{PM}_{2.5}$  influx rose from  $225.4 \text{ t h}^{-1}$

in 2015 and 228.5 t h<sup>-1</sup> in 2016 to 298.4 t h<sup>-1</sup> in 2017, while the afternoon PM<sub>2.5</sub> outflux increased from -292.3 t h<sup>-1</sup> in 2015 to -302.2 and -314.2 t h<sup>-1</sup> in 2016 and 2017, respectively.

In L593-596:

However, the morning influxes and afternoon outfluxes of ABLex-H did not show a continuous decrease over the three years. Instead, their values were relatively higher in both the 2015 and 2017 cold seasons (151.7 and 132.8 t h<sup>-1</sup> for morning influxes, and -264.9 and -220.5 t h<sup>-1</sup> for afternoon outfluxes) compared with those in 2016 (112.0 and -212.6 t h<sup>-1</sup>).

And in L605-607:

$\epsilon(\text{pNO}_3)$ , the proportion of pNO<sub>3</sub> in the sum of pNO<sub>3</sub> and gas-phase HNO<sub>3</sub>, decreased significantly across the three cold seasons (from 70.6% in 2015 to 67.7% in 2016 and 61.7% in 2017; Table S4), suggesting a greater tendency for pNO<sub>3</sub> to shift into the gas phase.

These additional notes will help readers grasp the key quantitative results without referring constantly to the figures and tables.

6) The conclusion that unfavorable meteorology can mask emission control benefits is powerful and has significant policy implications. This point could be further nuanced by adding a brief discussion in the final section about the differing timescales of these effects. While meteorological variability can clearly dominate inter-annual changes, it is crucial to emphasize that sustained, long-term emission reductions remain the fundamental and most effective strategy for improving air quality.

#### **Response:**

We appreciate this insightful suggestion and fully agree that meteorological effects and emission control act on PM<sub>2.5</sub> pollution variations on different timescales. While our results show that meteorological changes can temporarily offset the effects of emission control, it is important to mention that emission reductions should remain the primary strategy for long-term air quality improvement. In response to this comment, the following text has been added in the end of Conclusions, in L684-686:

Although meteorological variability can drive multi-annual changes in regional PM<sub>2.5</sub> pollution, sustained emission reductions remain the most fundamental and effective means to achieve long-term air quality improvement.

#### **References**

- Chen, T. F., Chang, K. H., and Tsai, C. Y.: Modeling direct and indirect effect of long range transport on atmospheric PM<sub>2.5</sub> levels, *Atmos. Environ.*, 89, 1–9, <https://doi.org/10.1016/j.atmosenv.2014.01.065>, 2014.
- Clappier, A., Belis, C. A., Pernigotti, D., and Thunis, P.: Source apportionment and sensitivity analysis: two methodologies with two different purposes, *Geosci. Model Dev.*, 10, 4245–4256, <https://doi.org/10.5194/gmd-10-4245-2017>, 2017.
- Qu, K., Wang, X., Xiao, T., Shen, J., Lin, T., Chen, D., He, L., Huang, X., Zeng, L., Lu, K., Ou, Y., and Zhang, Y.: Cross-regional transport of PM<sub>2.5</sub> nitrate in the Pearl River Delta, China: Contributions and mechanisms, *Sci. Total Environ.*, 753, 142439, <https://doi.org/10.1016/j.scitotenv.2020.142439>, 2021b.

Sun, J., Qin, M., Xie, X., Fu, W., Qin, Y., Sheng, L., Li, L., Li, J., Sulaymon, I. D., Jiang, L., Huang, L., Yu, X., and Hu, J.: Seasonal modeling analysis of nitrate formation pathways in Yangtze River Delta region, China, *Atmos. Chem. Phys.*, 22, 12629–12646, <https://doi.org/10.5194/acp-22-12629-2022>, 2022.

Uranishi, K., Shimadera, H., Saiki, S., Matsuo, T., and Kondo, A.: Source apportionment of nitrate aerosol concentration in Japan in fiscal year 2010 using an air quality model (in Japanese), *Japan Society for J. Japan Soc. Atmos. Environ./Taiki Kankyo Gakkaishi*, 53 (2018), 88–99, <https://doi.org/10.11298/taiki.53.88>, 2018.

Xu, J.-W., Lin, J., Luo, G., Adeniran, J., and Kong, H.: Foreign emissions exacerbate PM<sub>2.5</sub> pollution in China through nitrate chemistry, *Atmos. Chem. Phys.*, 23, 4149–4163, <https://doi.org/10.5194/acp-23-4149-2023>, 2023.
